# Supplementary material for: Localized, highly efficient secretion of signaling proteins by migrasomes
Source: PubMed Central journal article supplement (PMC11291916; doi:10.1038/s41422-024-00992-7), 2024-06-25
Supplement: 41422_2024_992_MOESM1_ESM.pdf [file 41422_2024_992_MOESM1_ESM.pdf]

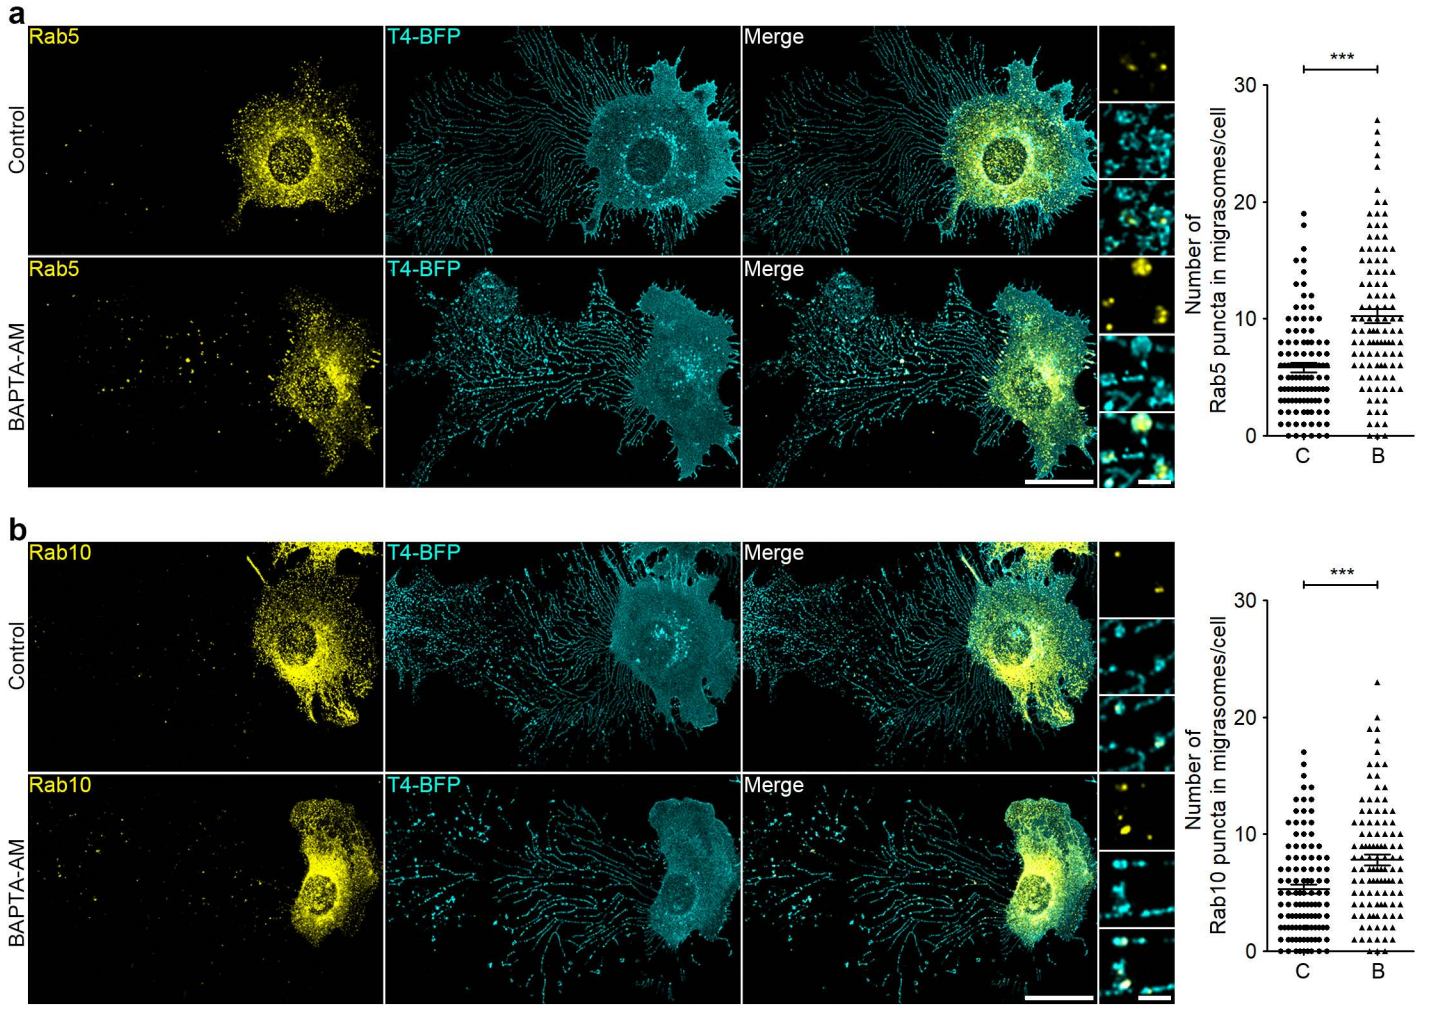

**Fig. S1 Rab5- and Rab10-labeled vesicles fuse with the migrasome membranes in a calcium-dependent manner.**

**a, b** Immunostaining of endogenous Rab5 (**a**) or Rab10 (**b**) in L929-T4-BFP cells treated with 10  $\mu$ M BAPTA-AM for 10 hr. Scale bar, 20  $\mu$ m. Middle panels, enlarged ROI. Scale bar, 2  $\mu$ m. Right panel, statistical analysis of the number of Rab5 (**a**) or Rab10 (**b**) puncta in migrasomes per cell. Error bars, mean  $\pm$  SEM.  $n > 100$  cells from three independent experiments. Two-tailed unpaired t-test was used for statistical analyses. \*\*\* $p < 0.001$ .
