# Supplementary material for: Localized, highly efficient secretion of signaling proteins by migrasomes
Source: PubMed Central journal article supplement (PMC11291916; doi:10.1038/s41422-024-00992-7), 2024-06-25
Supplement: 41422_2024_992_MOESM3_ESM.pdf [file 41422_2024_992_MOESM3_ESM.pdf]

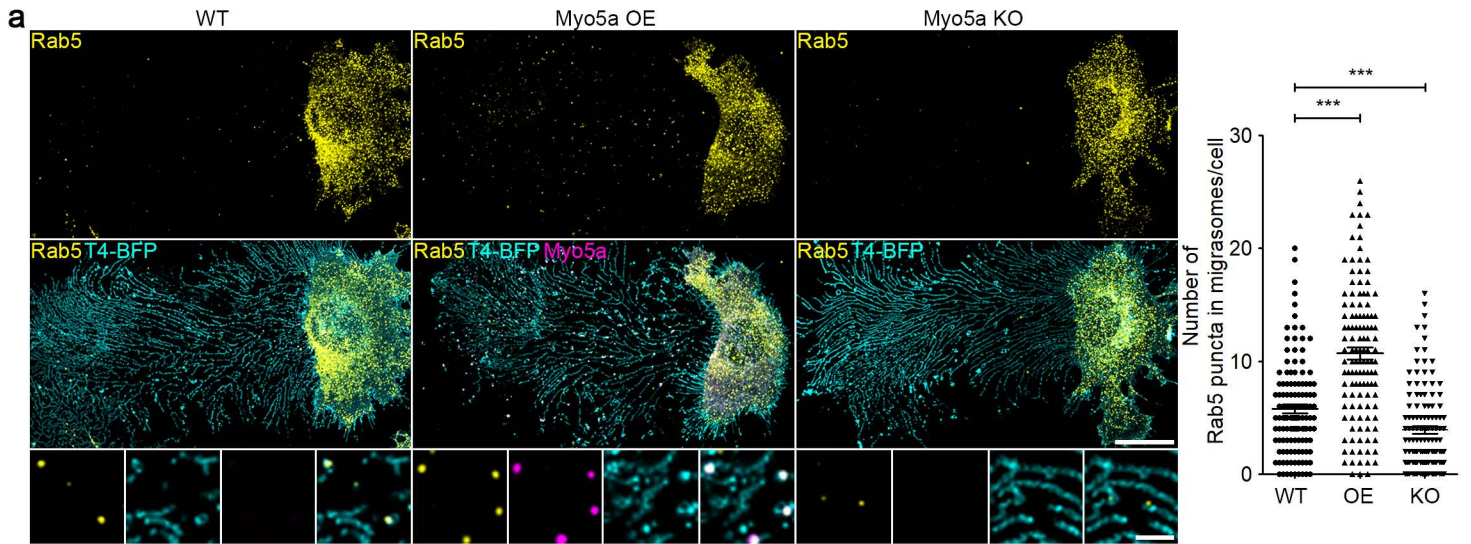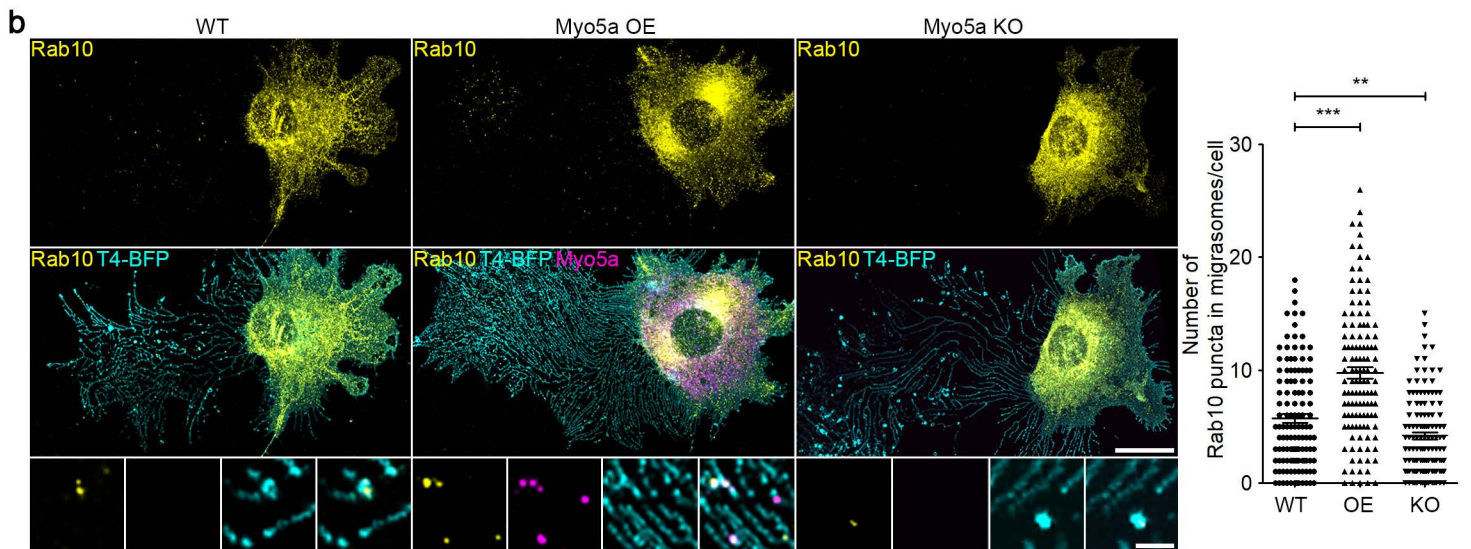

Figure S3

**Fig. S3 Rab5- and Rab10-labeled vesicles are transported into migrasomes by Myosin5a.**

**a, b** Immunostaining of endogenous Rab5 (**a**) or Rab10 (**b**) in WT, Myo5a OE and Myo5a KO L929-T4-BFP cells. Scale bar, 20  $\mu\text{m}$ . Lower panels, enlarged ROI. Scale bar, 2  $\mu\text{m}$ . Right panel, statistical analysis of the number of Rab5 (**a**) or Rab10 (**b**) puncta in migrasomes per cell. Error bars, mean  $\pm$  SEM.  $n > 100$  cells from three independent experiments. Two-tailed unpaired t-test was used for statistical analyses. \*\* $p < 0.01$ , \*\*\* $p < 0.001$ .
