# Supplementary material for: Localized, highly efficient secretion of signaling proteins by migrasomes
Source: PubMed Central journal article supplement (PMC11291916; doi:10.1038/s41422-024-00992-7), 2024-06-25
Supplement: 41422_2024_992_MOESM4_ESM.pdf [file 41422_2024_992_MOESM4_ESM.pdf]

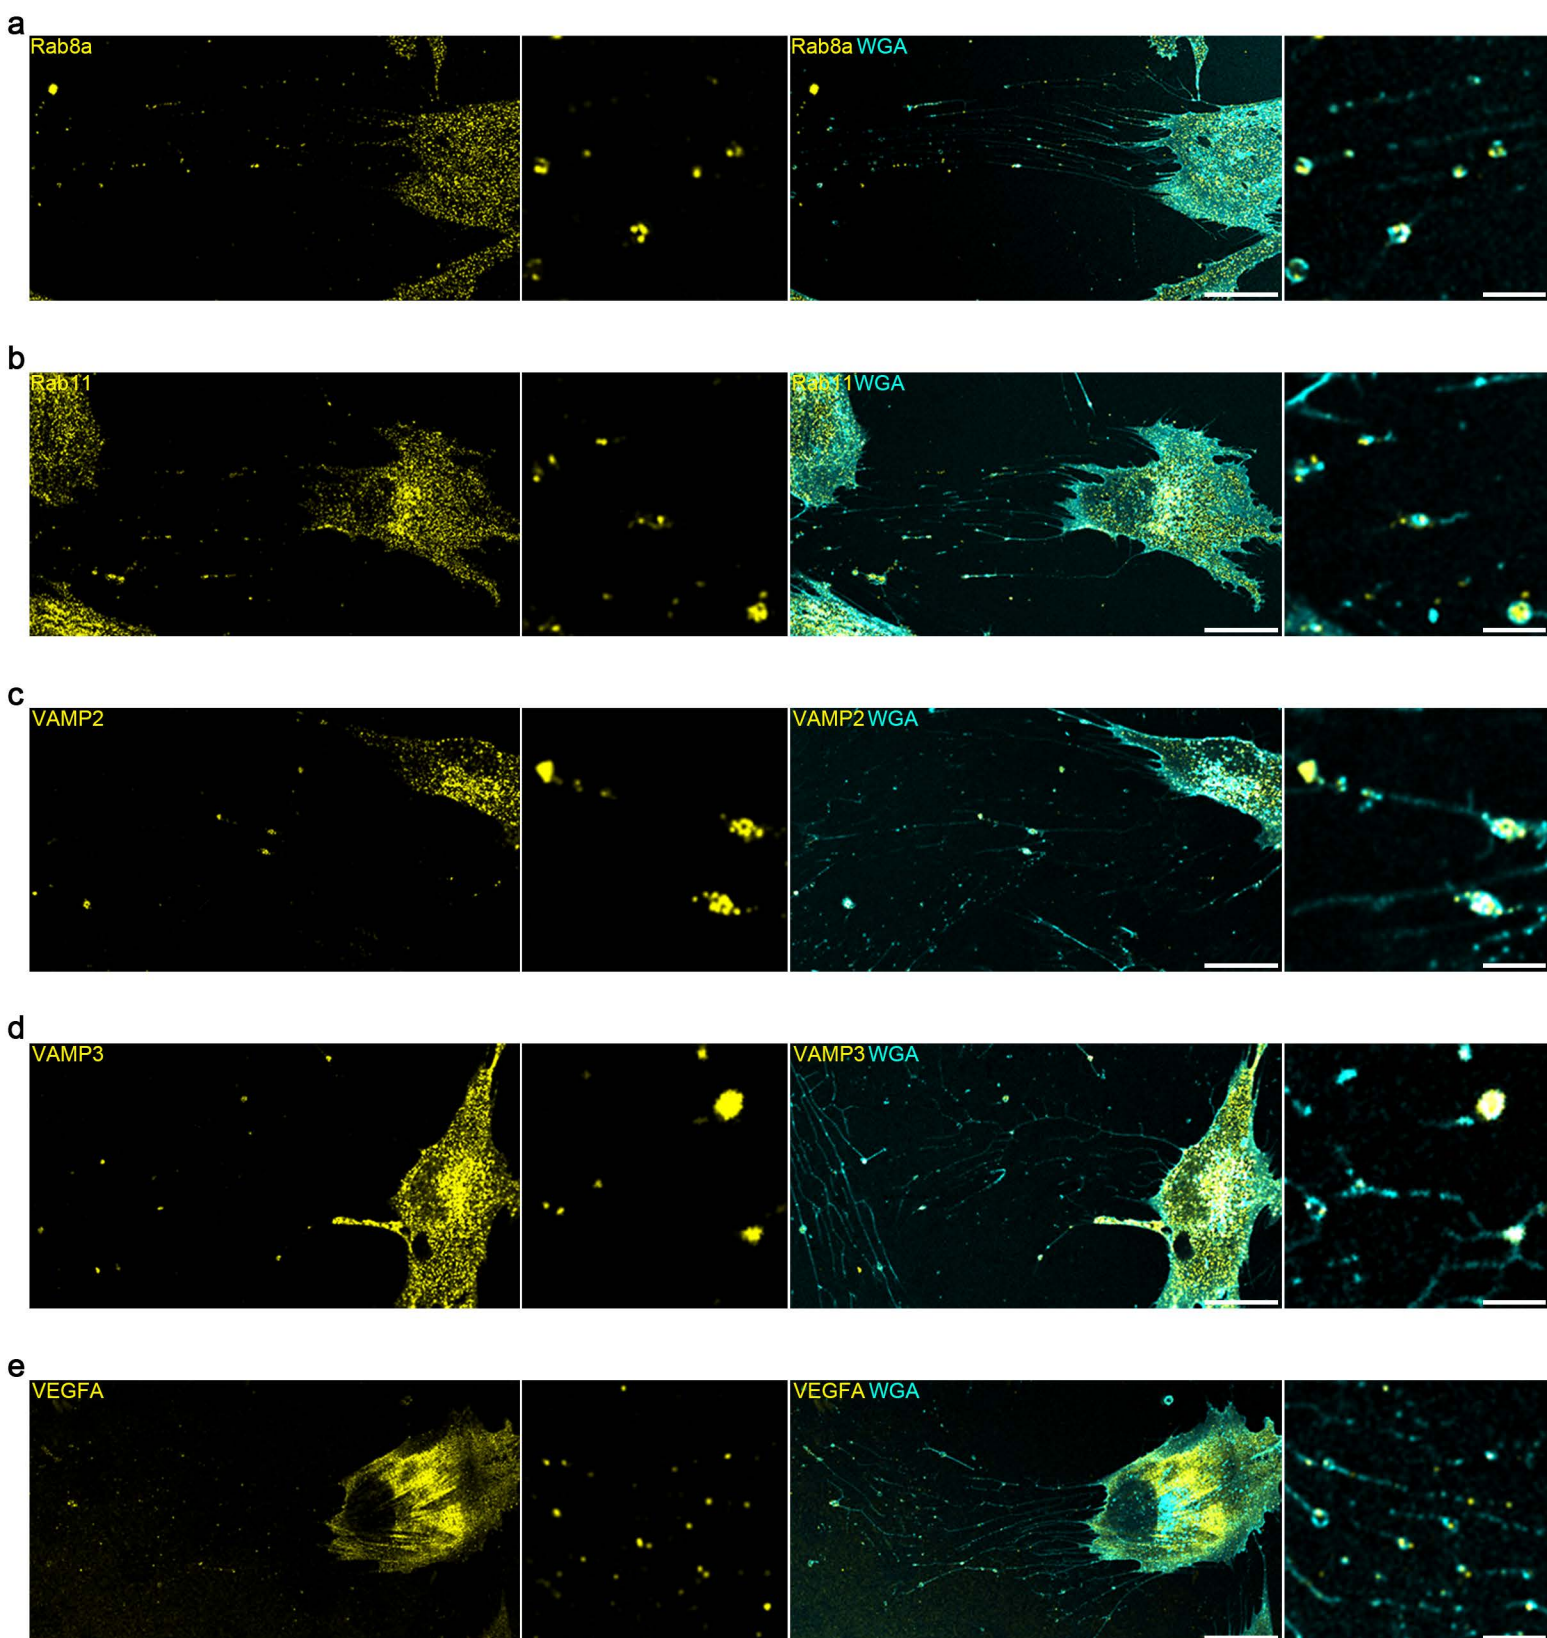

Figure S4

**Fig. S4 DPSCs and L929 cells utilize similar pathway for migrasome-mediated secretion.**

**a-e** Immunostaining of endogenous Rab8a (**a**), Rab11 (**b**), VAMP2 (**c**), VAMP3 (**d**) and VEGFA (**e**) in DPSCs. Scale bar, 20  $\mu\text{m}$ . The right panels show enlarged migrasome. Scale bar, 2  $\mu\text{m}$ .
