# Supplementary material for: Localized, highly efficient secretion of signaling proteins by migrasomes
Source: PubMed Central journal article supplement (PMC11291916; doi:10.1038/s41422-024-00992-7), 2024-06-25
Supplement: 41422_2024_992_MOESM12_ESM.pdf [file 41422_2024_992_MOESM12_ESM.pdf]

## **Supplementary video titles and legends**

### **Video S1 Continuous calcium signal within the migrasome during its formation.**

L929-T4-BFP cells were stained with Fluo-8 and then subjected to time-lapse imaging. Time interval, 180 s. Scale bar, 10  $\mu\text{m}$ .

### **Video S2 VAMP2 vesicles fuse with the migrasome membrane during migrasomes grow.**

L929-GFP-VAMP2 cells were subjected to time-lapse imaging. Time-lapse images were acquired at intervals of 30 s. Scale bar, 2  $\mu\text{m}$ .

### **Video S3 Myosin5a transports to the site of migrasome formation.**

Time-lapse imaging of L929 cells stably expressing GFP-Myo5a and T4-mCherry. Time interval, 90 s. Scale bar, 20  $\mu\text{m}$ .

### **Video S4 Two modes of the movement of Myosin5a transported into migrasomes.**

Grazing Incidence-Structured Illumination Microscopy (GI-SIM) imaging of L929- GFP-Myo5a cells. Time-lapse images were acquired at intervals of 30 s. Scale bar, 5  $\mu\text{m}$ .

### **Video S5 Myosin5a displays polarized distribution during cell migration.**

L929 cells stably expressing mCherry-Myo5a and T4-BFP, treated with or without 10  $\mu\text{M}$  GLPG0187, were subjected to time-lapse imaging. Time interval, 10 min. Scale bar, 20  $\mu\text{m}$ .

**Video S6 Cell migration causes the polarization of Rab8a vesicles to the rear end of the cell.**

L929 cells stably expressing GFP-Rab8a and T4-BFP, treated with or without 10  $\mu$ M GLPG0187, were subjected to time-lapse imaging. Time interval, 10 min. Scale bar, 20  $\mu$ m.

**Video S7 Cell migration causes the polarization of Rab11a vesicles to the rear end of the cell.**

L929 cells stably expressing GFP-Rab11a, treated with or without 10  $\mu$ M GLPG0187, were stained with WGA and then subjected to time-lapse imaging. Time interval, 10 min. Scale bar, 20  $\mu$ m.
